# Supplementary material for: Ezh2 represses the basal cell lineage during lung endoderm development
Source: Oxford University Press journal article supplement (doi:10.1242/dev.116947), 2014-12-16
Supplement: dev116947supp.pdf [file dev116947supp.pdf]

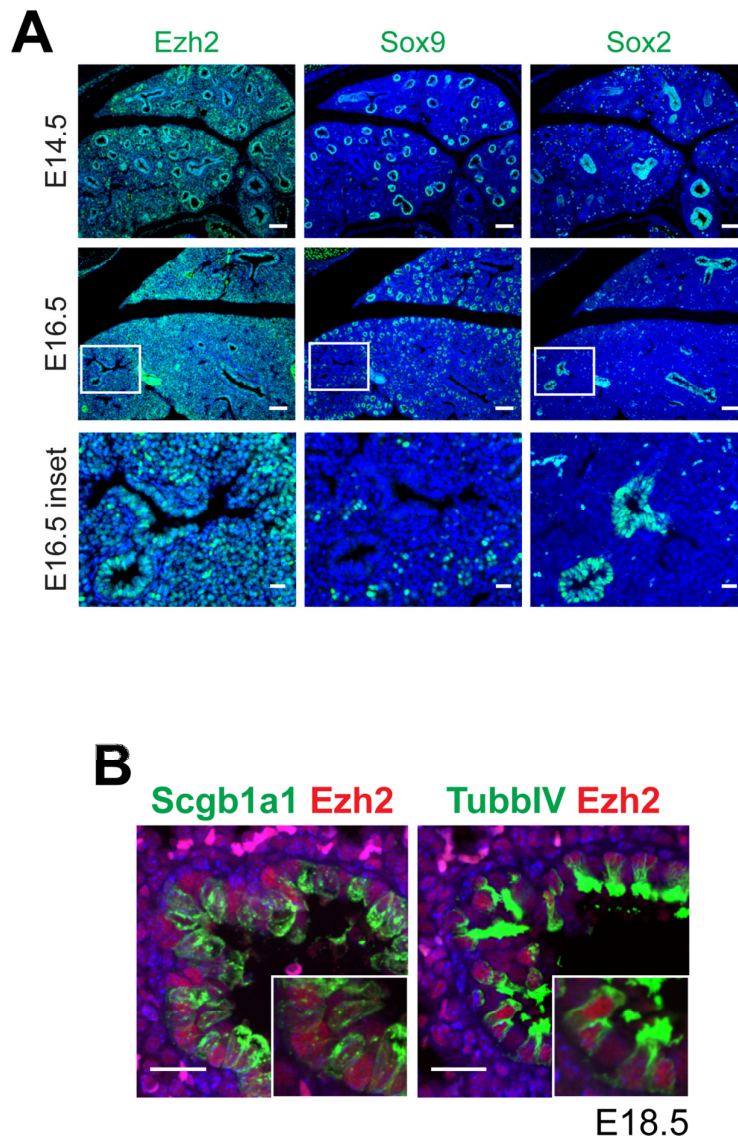

**Supplemental Figure 1. Expression of Ezh2 becomes restricted during late lung development.** (A) IHC for Ezh2, proximal airway epithelium marker Sox2, and distal epithelium marker Sox9 at E14.5 and E16.5. Note that Ezh2 appears in both Sox2 and Sox9-positive epithelium at these stages. (B) IHC for Ezh2 and mature proximal epithelium markers Scgb1a1 and TubbIV. Note that Ezh2 is more highly expressed in TubbIV-positive multi-ciliated cells than in Scgb1a1-positive club cells. Scale bar: E14.5 and E16.5=100 $\mu$ m; E16.5 inset and E18.5=20 $\mu$ m.

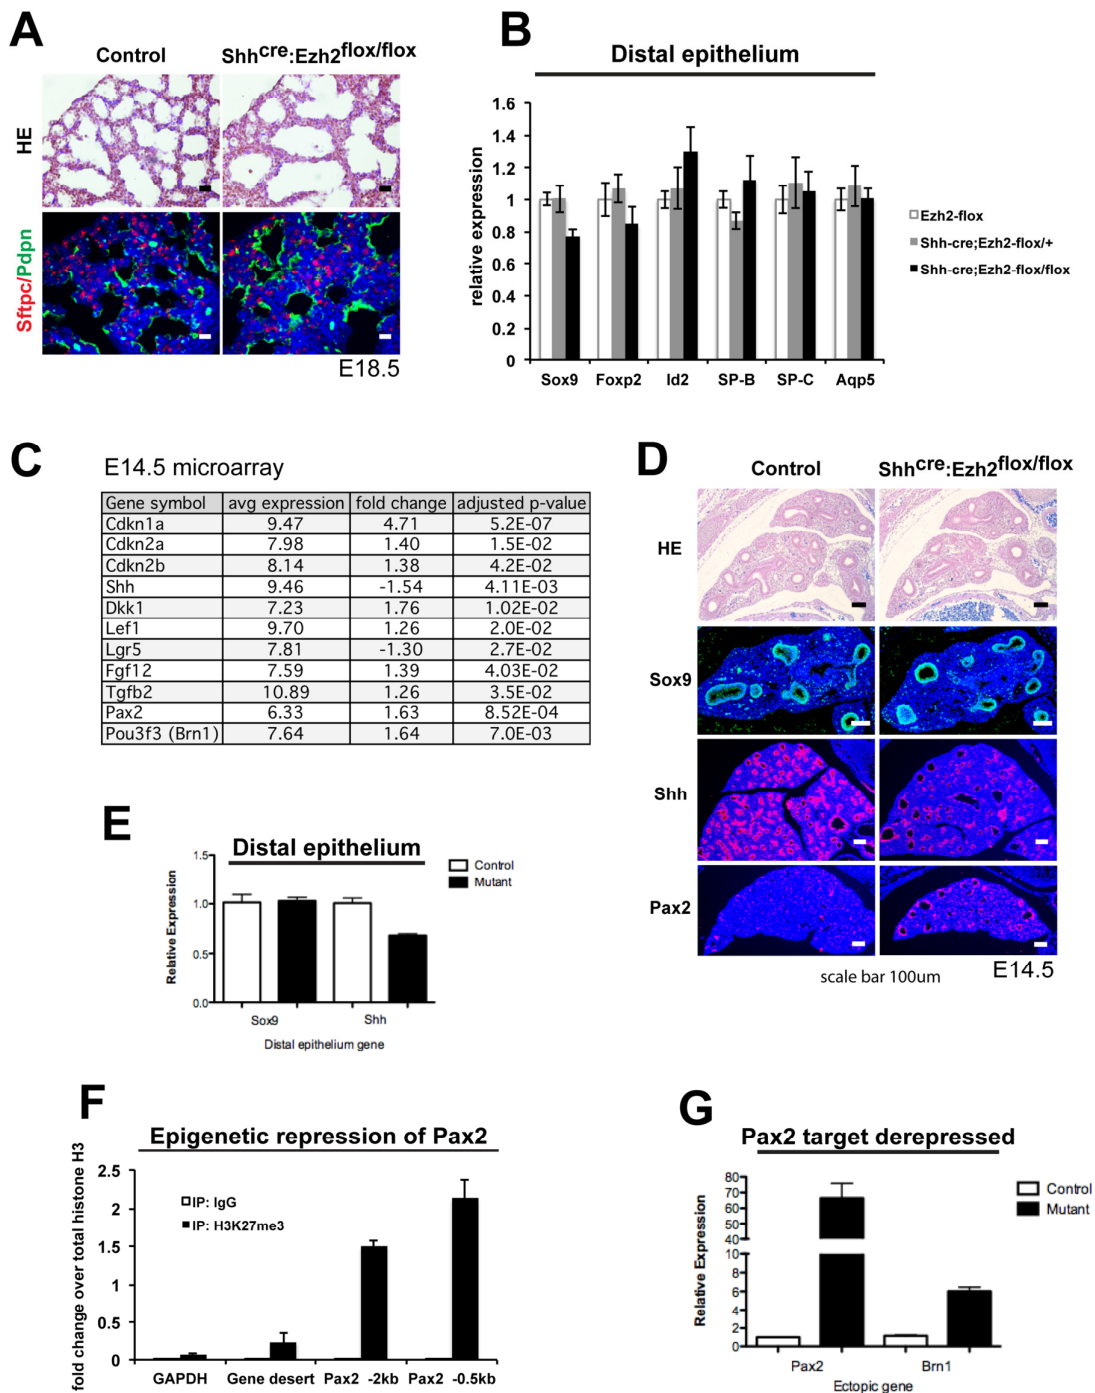

**Supplemental Figure 2. Alveolar defects include de-repression of Ezh2 target genes and altered expression of signaling pathways.** (A) H+E and IHC for Sftpc and Pdpn on E18.5 control and *Shh<sup>cre</sup>;Ezh2<sup>flox/flox</sup>* mutant lungs.

(B) qPCR for the indicated distal epithelial marker genes at E18.5. (C) Subset of gene expression changes that could be related to defects in distal epithelial differentiation in *Shh<sup>cre</sup>:Ezh2<sup>flox/flox</sup>* mutant lungs. (D) H+E, IHC for Sox9, and ISH for Shh and Pax2 on control and *Shh<sup>cre</sup>:Ezh2<sup>flox/flox</sup>* mutant lungs at E14.5. (E) Q-PCR for Sox9 and Shh at E14.5. (F) ChIP-qPCR for H3K27me3 marks on the *Pax2* promoter and an unrelated gene desert region as well as the *Gapdh* promoter at E12.5. (G) qPCR for Pax2 and Brn2 at E14.5. Scale bar: E18.5=20µm; E14.5=100µm.

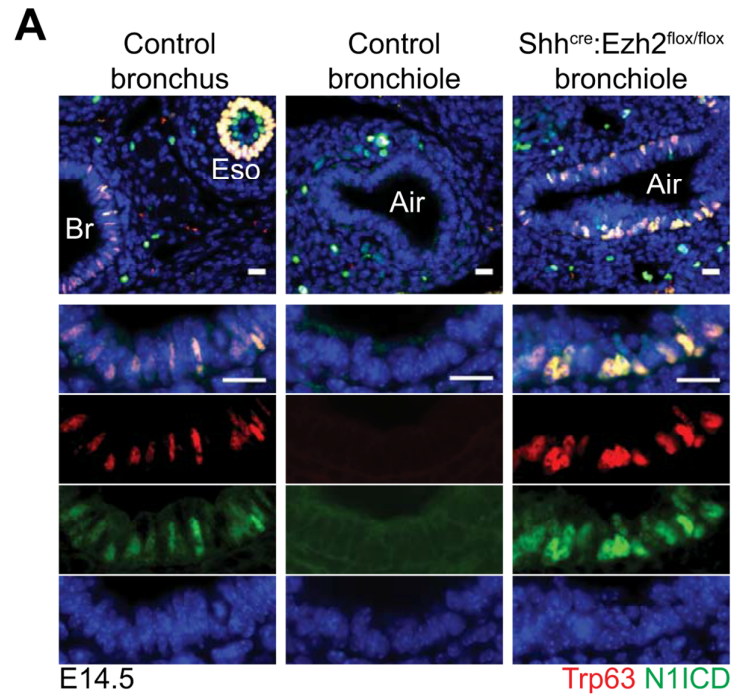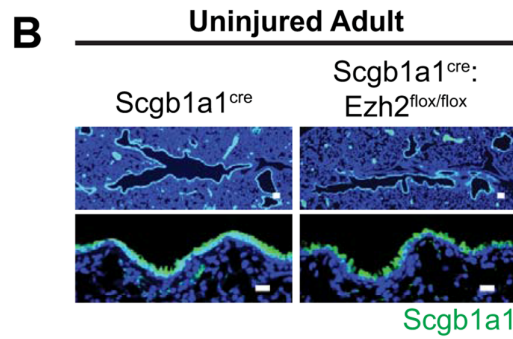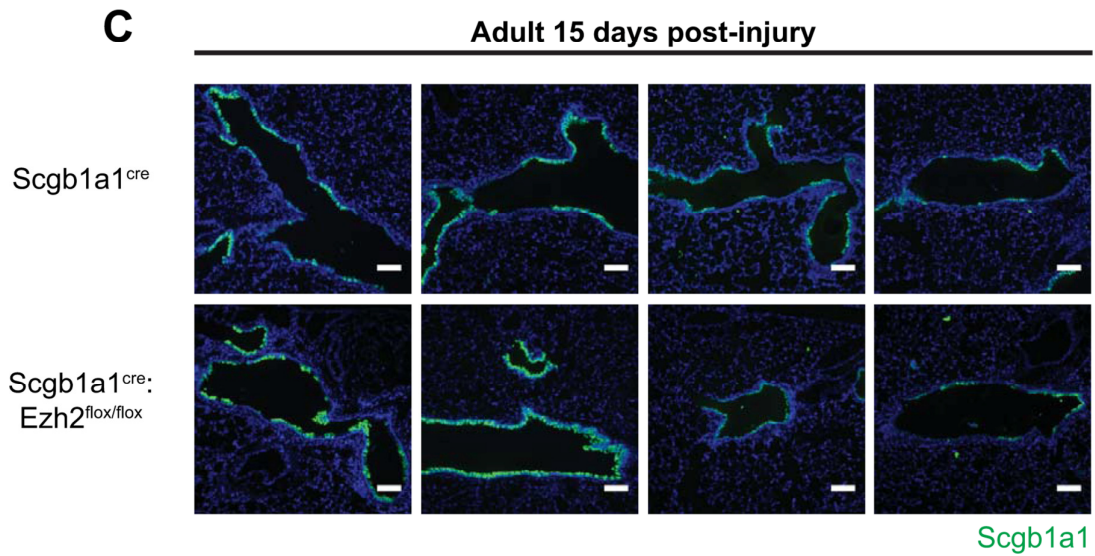

**Supplemental Figure 3. Ezh2 loss inhibits club cell development, but not postnatal homeostasis or regeneration.** (A) IHC for Trp63 and NICD shows co-expression in the control bronchus and the *Shh<sup>cre</sup>:Ezh2<sup>flox/flox</sup>* mutant bronchioles, but not the control bronchiole. (B) *Scgb1a1<sup>cre</sup>:Ezh2<sup>flox/flox</sup>* adult mutant lungs contain normal numbers of Scgb1a1-positive secretory cells. (C) Club cell regeneration after naphthalene-induced injury is unaffected in *Scgb1a1<sup>cre</sup>:Ezh2<sup>flox/flox</sup>* lungs as compared to control lungs. Scale bar: (A)=20µm; (B upper row)=100µm; (B lower row)=20µm; (C)=100µm.

**Table S1. Microarray data for *Ezh2* knockout**

[Click here to Download Table S1](#)

**Table S2. PCR primers**

[Click here to Download Table S2](#)
